# Supplementary material for: Determining virus-host interactions and glycerol metabolism profiles in geographically diverse solar salterns with metagenomics
Source: PeerJ journal article supplement (doi:10.7717/peerj.2844), 2017-01-10

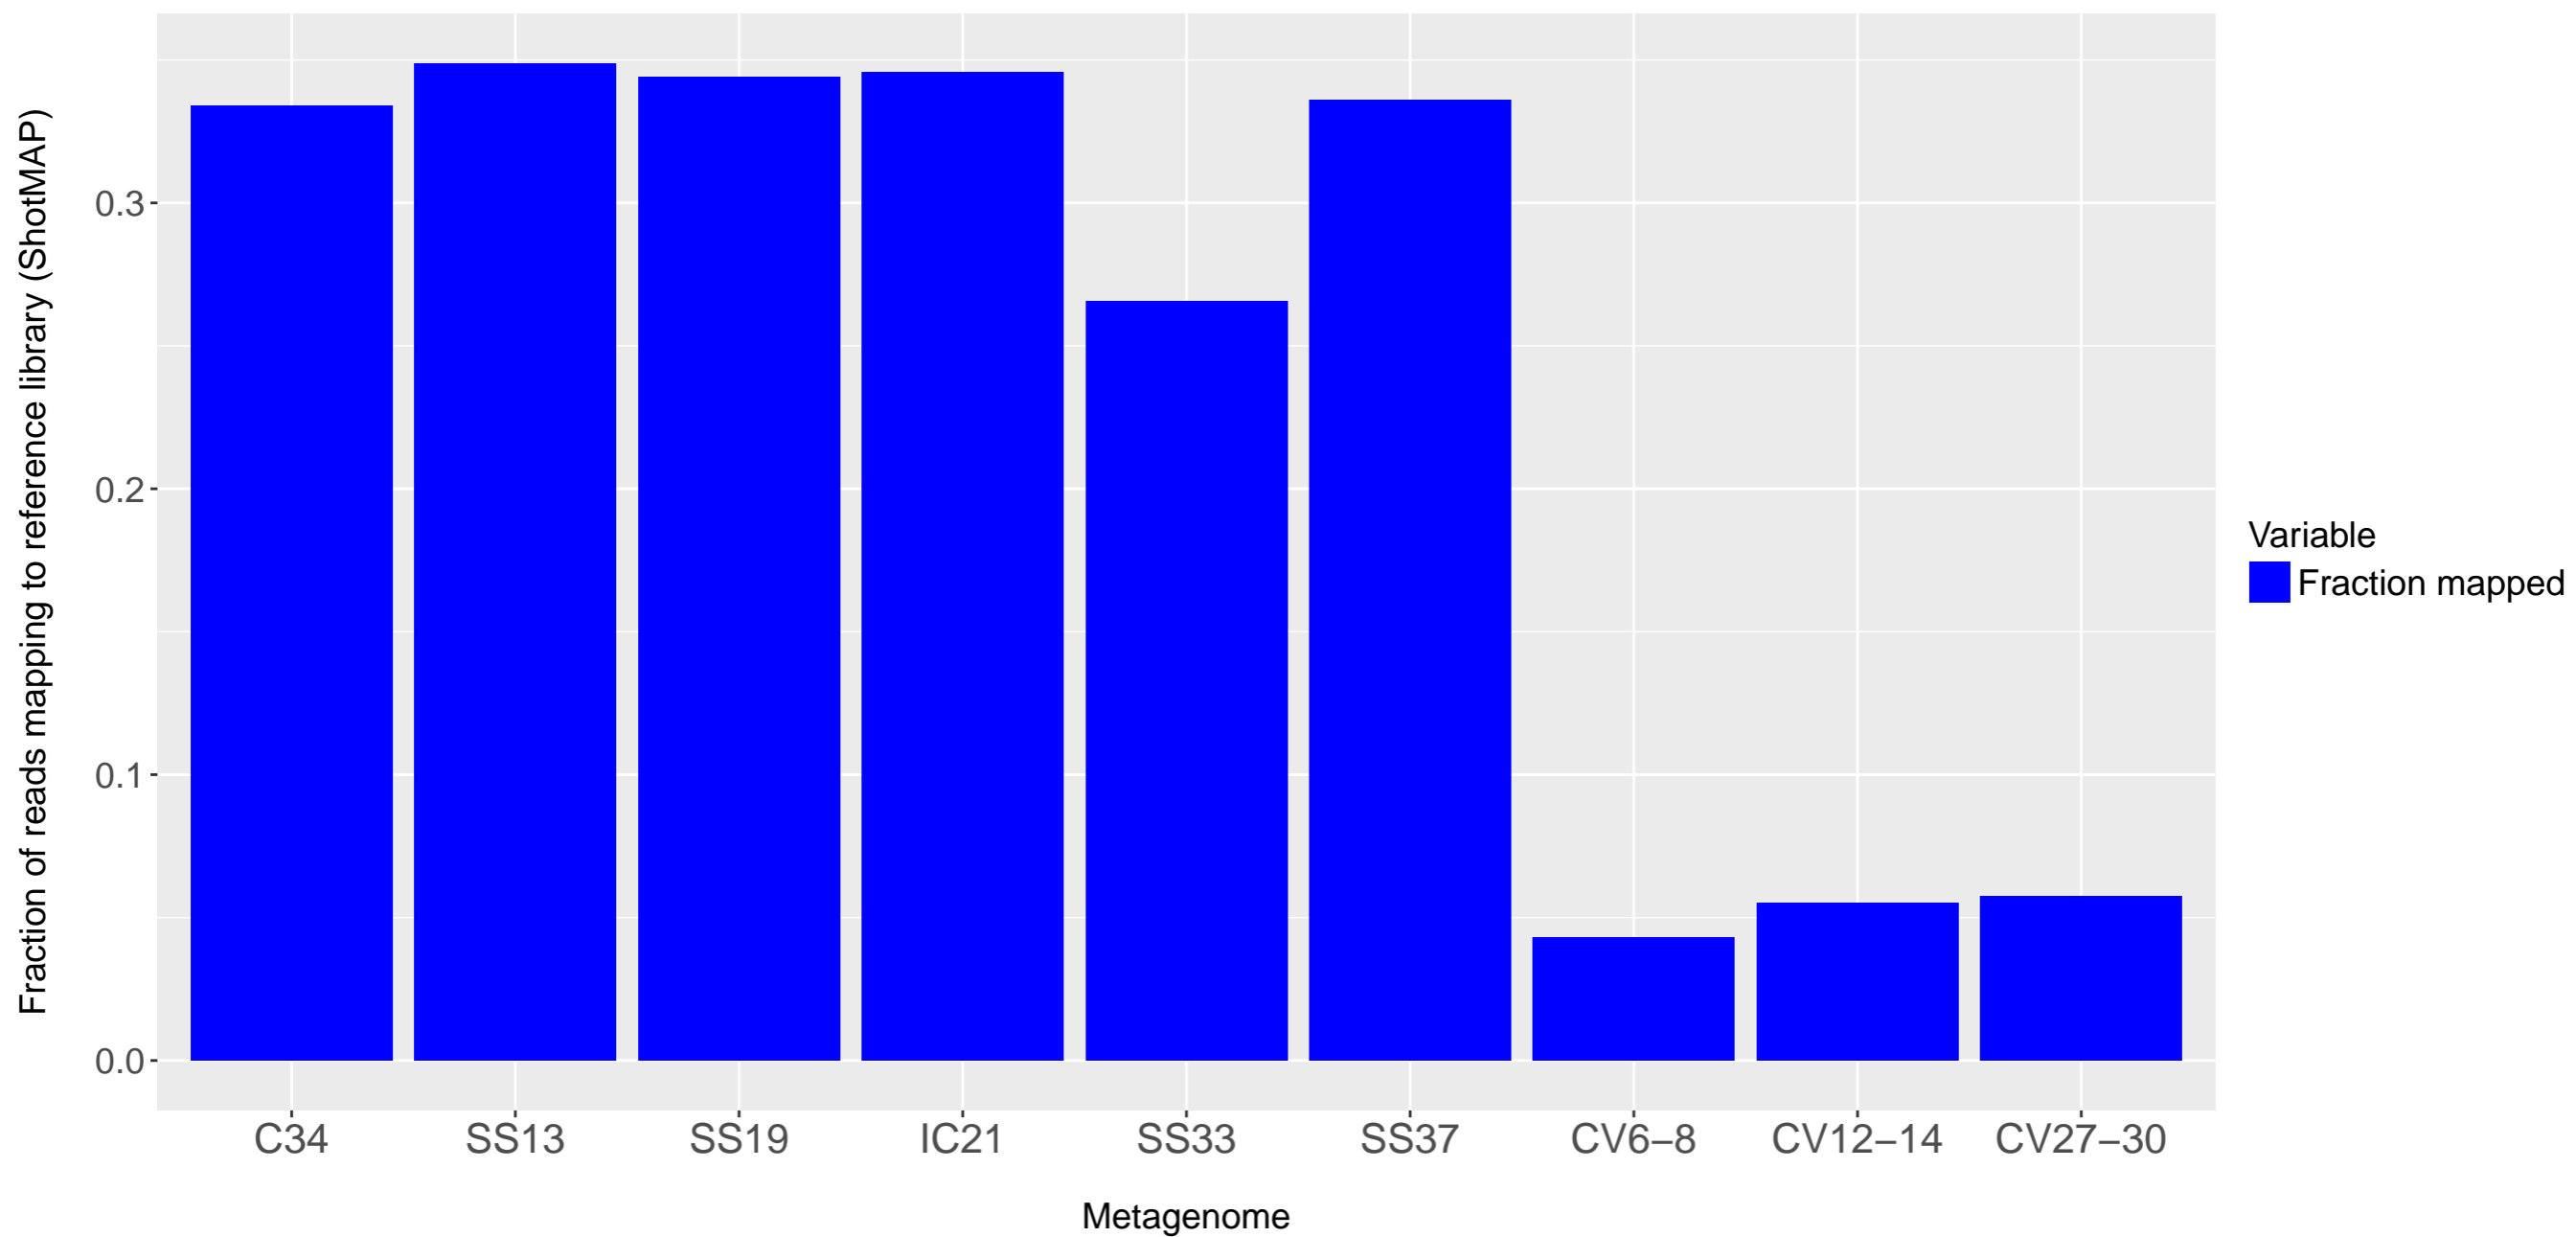

Supplement: Supplemental_Figure_S3.pdf [file Supplemental_Figure_S3.pdf]
